# Supplementary material for: Efficacy and safety of Omega-3 polyunsaturated fatty acids in adjuvant treatments for colorectal cancer: A meta-analysis of randomized controlled trials
Source: PubMed Central journal article supplement (PMC10151497; doi:10.3389/fphar.2023.1004465), 2023-04-18
Supplement: DataSheet3.pdf [file DataSheet3.pdf]

Table S5 Effects of O3FA on adjuvant treatments for colorectal cancer based on subgroup analysis

|               | Subgrouped by                                    | No. of trials | No. of participants | Meta-analysis |             |                 | Heterogeneity      |                                    |
|---------------|--------------------------------------------------|---------------|---------------------|---------------|-------------|-----------------|--------------------|------------------------------------|
|               |                                                  |               |                     | MD            | 95%CI       | <i>p</i> -Value | I <sup>2</sup> (%) | Cochrane Q-test ( <i>p</i> -Value) |
| TNF- $\alpha$ | Routes of administration                         |               |                     |               |             |                 |                    |                                    |
|               | PO                                               | 5             | 249                 | -0.52         | -1.31,0.26  | 0.19            | 50                 | 0.09                               |
|               | TPN                                              | 3             | 183                 | -1.26         | -2.25,-0.27 | 0.01            | 4                  | 0.35                               |
|               | Timing of pre- or post- operative administration |               |                     |               |             |                 |                    |                                    |
|               | Before the surgery                               | 4             | 305                 | -1.01         | -1.77,-0.26 | 0.00            | 0                  | 0.47                               |
|               | After the surgery                                | 4             | 127                 | -0.64         | -1.77,0.50  | 0.27            | 59                 | 0.06                               |
|               |                                                  |               |                     |               |             |                 |                    |                                    |
| CRP           | Routes of administration                         |               |                     |               |             |                 |                    |                                    |
|               | PO                                               | 4             | 209                 | -6.55         | -14.16,1.05 | 0.09            | 82                 | 0.00                               |
|               | TPN                                              | 1             | 85                  | -0.03         | -2.10,2.04  | 0.98            | NA                 | NA                                 |
|               | Timing of pre- or post- operative administration |               |                     |               |             |                 |                    |                                    |

|              |                                                  |    |     |       |               |      |    |      |
|--------------|--------------------------------------------------|----|-----|-------|---------------|------|----|------|
|              | Before the surgery                               | 3  | 265 | -1.32 | -4.01,1.37    | 0.34 | 81 | 0.00 |
|              | After the surgery                                | 2  | 29  | -18.3 | -26.11,-10.52 | 0.00 | 0  | 0.81 |
|              |                                                  |    |     | 2     |               |      |    |      |
| IL-6         | Routes of administration                         |    |     |       |               |      |    |      |
|              | PO                                               | 4  | 238 | -4.31 | -6.47,-2.15   | 0.00 | 0  | 0.79 |
|              | TPN                                              | 3  | 183 | -5.98 | -9.92,-2.03   | 0.00 | 0  | 0.39 |
|              | Timing of pre- or post- operative administration |    |     |       |               |      |    |      |
|              | Before the surgery                               | 4  | 305 | -4.33 | -6.48,-2.18   | 0.00 | 0  | 0.90 |
|              | After the surgery                                | 3  | 116 | -6.99 | -14.99,1.01   | 0.09 | 16 | 0.31 |
| IL-1 $\beta$ | Routes of administration                         |    |     |       |               |      |    |      |
|              | PO                                               | NA | NA  | NA    | NA            | NA   | NA | NA   |
|              | TPN                                              | NA | NA  | NA    | NA            | NA   | NA | NA   |
|              | Timing of pre- or post- operative administration |    |     |       |               |      |    |      |
|              | Before the surgery                               | 1  | 40  | -0.26 | -0.74,0.22    | 0.29 | NA | NA   |
|              | After the surgery                                | 2  | 29  | 1.10  | -1.25,3.44    | 0.36 | 91 | 0.00 |
| Albumin      | Routes of administration                         |    |     |       |               |      |    |      |
|              | PO                                               | 3  | 69  | 0.45  | -0.13,1.04    | 0.13 | 89 | 0.00 |

|        |                                                  |    |     |       |            |      |    |      |
|--------|--------------------------------------------------|----|-----|-------|------------|------|----|------|
|        | TPN                                              | 1  | 85  | -0.03 | -0.23,0.17 | 0.77 | NA | NA   |
|        | Timing of pre- or post- operative administration |    |     |       |            |      |    |      |
|        | Before the surgery                               | 2  | 125 | 0.57  | -0.64,1.77 | 0.36 | 95 | 0.00 |
|        | After the surgery                                | 2  | 29  | 0.12  | -0.12,0.37 | 0.32 | 34 | 0.22 |
| BMI    | Routes of administration                         |    |     |       |            |      |    |      |
|        | PO                                               | NA | NA  | NA    | NA         | NA   | NA | NA   |
|        | TPN                                              | NA | NA  | NA    | NA         | NA   | NA | NA   |
|        | Timing of pre- or post- operative administration |    |     |       |            |      |    |      |
|        | Before the surgery                               | 2  | 180 | -0.64 | -1.84,0.57 | 0.30 | 0  | 0.35 |
|        | After the surgery                                | 2  | 29  | 2.14  | -1.05,5.33 | 0.19 | 0  | 0.98 |
| Weight | Routes of administration                         |    |     |       |            |      |    |      |
|        | PO                                               | NA | NA  | NA    | NA         | NA   | NA | NA   |
|        | TPN                                              | NA | NA  | NA    | NA         | NA   | NA | NA   |
|        | Timing of pre- or post- operative administration |    |     |       |            |      |    |      |
|        | Before the surgery                               | 2  | 180 | -0.67 | -6.35,5.01 | 0.82 | 57 | 0.13 |

|                   |                                                  |                    |      |       |              |             |      |      |
|-------------------|--------------------------------------------------|--------------------|------|-------|--------------|-------------|------|------|
| LOS               | After the surgery                                | 3                  | 40   | 5.41  | -2.15,12.96  | 0.16        | 0    | 0.97 |
|                   | Routes of administration                         |                    |      |       |              |             |      |      |
|                   | PO                                               | 1                  | 125  | -1.00 | -9.00,7.00   | 0.81        | NA   | NA   |
|                   | TPN                                              | 2                  | 224  | -0.74 | -4.88,3.40   | 0.73        | 86   | 0.00 |
|                   | PN                                               | 1                  | 35   | 1.00  | -0.04,2.04   | 0.06        | NA   | NA   |
|                   | EN                                               | 1                  | 100  | -2.40 | -3.78,-1.02  | 0.00        | NA   | NA   |
|                   | Timing of pre- or post- operative administration |                    |      |       |              |             |      |      |
| Quality of life   | Before the surgery                               | 3                  | 260  | -0.70 | -3.69,2.29   | 0.65        | 87   | 0.00 |
|                   | After the surgery                                | 2                  | 224  | -0.74 | -4.88,3.40   | 0.73        | 86   | 0.00 |
|                   | Routes of administration                         |                    |      |       |              |             |      |      |
|                   | PO                                               | NA                 | NA   | NA    | NA           | NA          | NA   | NA   |
|                   | TPN                                              | NA                 | NA   | NA    | NA           | NA          | NA   | NA   |
|                   | Timing of pre- or post- operative administration |                    |      |       |              |             |      |      |
|                   | Dosage                                           | Before the surgery | 1    | 140   | 27.70        | 26.81,28.59 | 0.00 | NA   |
| After the surgery |                                                  | 2                  | 192  | -0.43 | -38.64,37.79 | 0.98        | 99   | 0.00 |
| EPA <1.80g/d      |                                                  | 15                 | 1074 | 0.98  | 0.88,1.09    | 0.68        | 0    | 0.86 |
| EPA >1.80g/d      |                                                  | 4                  | 482  | 1.13  | 0.96,1.34    | 0.14        | 5    | 0.37 |
| TNM staging       | TNM staging II                                   | 7                  | 285  | 0.93  | 0.74,1.17    | 0.54        | 0    | 0.89 |

|                 |   |     |      |           |      |   |      |
|-----------------|---|-----|------|-----------|------|---|------|
| TNM staging III | 9 | 475 | 1.06 | 0.88,1.28 | 0.56 | 0 | 0.96 |
| TNM staging IV  | 4 | 310 | 0.98 | 0.81,1.17 | 0.79 | 0 | 0.99 |

| Subgrouped by                                        | No. of trials | No. of participants | Meta-analysis |           |                 | Heterogeneity      |                                    |
|------------------------------------------------------|---------------|---------------------|---------------|-----------|-----------------|--------------------|------------------------------------|
|                                                      |               |                     | RR            | 95%CI     | <i>p</i> -Value | I <sup>2</sup> (%) | Cochrane Q-test ( <i>p</i> -Value) |
| Rates of infectious and non-infectious complications |               |                     |               |           |                 |                    |                                    |
| Routes of administration                             |               |                     |               |           |                 |                    |                                    |
| PO                                                   | 3             | 342                 | 0.85          | 0.49,1.46 | 0.55            | 57                 | 0.10                               |
| TPN                                                  | 3             | 87                  | 0.95          | 0.53,1.68 | 0.85            | 27                 | 0.25                               |
| PN                                                   | 2             | 76                  | 3.73          | 1.52,9.17 | 0.00            | 0                  | 0.82                               |
| EN                                                   | 1             | 24                  | 0.41          | 0.19,0.91 | 0.03            | NA                 | NA                                 |
| Timing of pre- or post- operative administration     |               |                     |               |           |                 |                    |                                    |

|               |                                                  |    |      |      |            |      |    |      |
|---------------|--------------------------------------------------|----|------|------|------------|------|----|------|
| CRC mortality | Before the surgery                               | 7  | 617  | 1.02 | 0.67,1.56  | 0.92 | 68 | 0.00 |
|               | After the surgery                                | 2  | 98   | 0.54 | 0.20,1.47  | 0.23 | 0  | 0.60 |
|               | Routes of administration                         |    |      |      |            |      |    |      |
|               | PO                                               | 3  | 446  | 0.86 | 0.28,2.70  | 0.80 | 0  | 0.95 |
|               | EN                                               | 1  | 100  | 1.00 | 0.06,15.55 | 1.00 | NA | NA   |
| Therapy       | Timing of pre- or post- operative administration |    |      |      |            |      |    |      |
|               | Before the surgery                               | NA | NA   | NA   | NA         | NA   | NA | NA   |
|               | After the surgery                                | NA | NA   | NA   | NA         | NA   | NA | NA   |
|               | Chemotherapy                                     | 2  | 192  | 1.00 | 0.82,1.22  | 1.00 | 0  | 0.69 |
|               | Surgery                                          | 11 | 1022 | 1.07 | 0.96,1.19  | 0.23 | 31 | 0.15 |
|               | Surgery combined with chemotherapy               | 6  | 342  | 0.99 | 0.85,1.15  | 0.88 | 0  | 1    |

O3FA,omega-3 polyunsaturated fatty acid; tumor necrosis factor-alpha,TNF- ; C-reactive protein,CRP; interleukin-6,IL-6; interleukin-1beta,IL-1 ; body mass index,BMI; length of hospital stay,LOS; total parenteral nutrition, TPN; parenteral nutrition,PN; peros,PO; enteral nutrition,EN; eicosapentaenoic acid,EPA.
